# Supplementary material for: World History and Geography: Ancient Civilizations. Course Models for the History-Social Science Framework: Grade 6.
Source: Royal Society of Chemistry journal article supplement (doi:10.1039/d2dt03485a), 1993-01-01
Supplement: d2dt03485a1.pdf [file d2dt03485a1.pdf]

## SUPPORTING INFORMATION

# Pyridine Modifications Regulate Electronics and Reactivity of Fe-Pyridinophane Complexes

Magy A. Mekhail, Kristof Pota, Sugam Kharel, David M. Freire, Kayla N. Green\*

Department of Chemistry and Biochemistry, Texas Christian University, Fort Worth, Texas 76129, United States.

[kayla.green@tcu.edu](mailto:kayla.green@tcu.edu)

|                                                                                                                                              |     |
|----------------------------------------------------------------------------------------------------------------------------------------------|-----|
| <b>EXPERIMENTAL METHODS</b> .....                                                                                                            | S3  |
| <b>SYNTHETIC PROCEDURE</b> .....                                                                                                             | S4  |
| <b>Scheme S1: Synthetic route to IPyN<sub>3</sub> (L4) macrocycle</b> .....                                                                  | S3  |
| <b>Figure S1. <sup>1</sup>H NMR (DMSO-d<sub>6</sub>) spectrum of 2</b> .....                                                                 | S4  |
| <b>Figure S2. <sup>1</sup>H (top) and <sup>13</sup>C{<sup>1</sup>H} (bottom) NMR (CDCl<sub>3</sub>) spectra of 3</b> .....                   | S5  |
| <b>Figure S3. <sup>1</sup>H NMR (Acetone-d<sub>6</sub>) spectrum of 4</b> .....                                                              | S6  |
| <b>Figure S4. <sup>1</sup>H (top) and <sup>13</sup>C{<sup>1</sup>H} (bottom) NMR (DMSO-d<sub>6</sub>) spectra of 5</b> .....                 | S7  |
| <b>Figure S5. <sup>1</sup>H (top) and <sup>13</sup>C{<sup>1</sup>H} (bottom) NMR (D<sub>2</sub>O) spectra of 6·HCl</b> .....                 | S9  |
| <b>Scheme S2. Synthetic route to <sup>NMe<sub>2</sub></sup>PyN<sub>3</sub> macrocycle</b> .....                                              | S9  |
| <b>Figure S6. <sup>1</sup>H NMR (CDCl<sub>3</sub>) spectrum of 6</b> .....                                                                   | S11 |
| <b>Figure S7. <sup>1</sup>H (top) and <sup>13</sup>C{<sup>1</sup>H} (bottom) NMR (D<sub>2</sub>O) spectra of L1</b> ..                       | S13 |
| <b>POTENTIOMETRIC RESULTS</b> .....                                                                                                          | S15 |
| <b>Table S1. Binding stability constants (log β) for ligands L1, L2, and L4 with Fe(II)</b> .....                                            | S14 |
| <b>Figure S8. Species distribution curves for [FeL1] (I = 0.15 M NaCl, T = 25 °C, [L1]<sub>tot</sub> = [Fe]<sub>tot</sub> = 2 mM)</b> .....  | S14 |
| <b>Figure S9. Species distribution curves for [FeL2] (I = 0.15 M NaCl, T = 25 °C, [L1]<sub>tot</sub> = [Fe]<sub>tot</sub> = 2 mM)</b> .....  | S15 |
| <b>Figure S10. Species distribution curves for [FeL4] (I = 0.15 M NaCl, T = 25 °C, [L1]<sub>tot</sub> = [Fe]<sub>tot</sub> = 2 mM)</b> ..... | S15 |
| <b>X-RAY DIFFRACTION RESULTS</b> .....                                                                                                       | S16 |
| <b>Table S2. Crystal data, intensity collections, and structure refinement parameters for FeL1, FeL2 and FeL4</b> .....                      | S16 |

|                                                                              |            |
|------------------------------------------------------------------------------|------------|
| <b>Figure S11. Solid state structure of FeL1 showing atom labeling. ....</b> | <b>S17</b> |
| <b>Table S3. Bond Lengths for FeL1. ....</b>                                 | <b>S17</b> |
| <b>Table S4. Bond Angles for FeL1. ....</b>                                  | <b>S18</b> |
| <b>Figure S12. Solid state structure of FeL2 showing atom labeling. ....</b> | <b>S19</b> |
| <b>Table S5. Bond Lengths for FeL2. ....</b>                                 | <b>S19</b> |
| <b>Table S6. Bond Angles for FeL2. ....</b>                                  | <b>S20</b> |
| <b>Figure S13. Solid state structure of FeL4 showing atom labeling. ....</b> | <b>S21</b> |
| <b>Table S7. Bond Lengths for FeL4. ....</b>                                 | <b>S21</b> |
| <b>Table S8. Bond Angles for FeL4. ....</b>                                  | <b>S23</b> |

## EXPERIMENTAL METHODS

### SYNTHETIC PROCEDURES

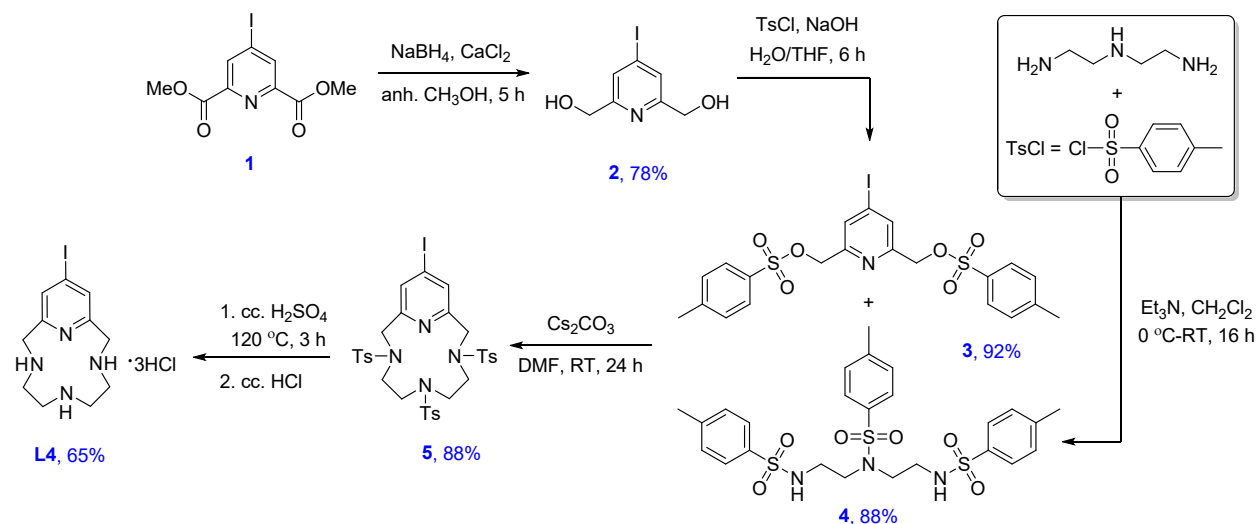

**Scheme S1:** Synthetic route to **L4** (<sup>1</sup>PyN<sub>3</sub>) macrocycle.

**Synthesis of 2.** Molecule **1** was synthesized using previously published procedure.<sup>2</sup> A 250 mL two-necked round bottom flask was charged with **1** (8.08 g, 25.1 mmol), finely powdered CaCl<sub>2</sub> (2.79 g, 25.2 mmol), and anhydrous MeOH (150 mL) under N<sub>2</sub> atmosphere. NaBH<sub>4</sub> (1.89 g, 50.6 mmol) was added portion-wise for ca. 10 min to the suspension at room temperature and stirred. During the addition, the color of the white suspension changed to bright pink and then orange. The reaction was monitored by TLC [*R*<sub>f</sub> (**1**) = 0.53, *R*<sub>f</sub> (**2**) = 0.1 (diethyl ether)]. After 5 h, the resulting colorless suspension was filtered through silica gel (3 cm × 2 cm, rinsing with MeOH). The solvents of the filtrate were removed by rotary evaporation and the residual colorless solid was dissolved in 1 M HCl (100 mL). The pH of the solution was raised to pH 12 by the addition of 1.0 M aqueous NaOH, resulting in a solid precipitate. The tan precipitate was isolated by filtration, washed with water (200 mL), and dried using rotary evaporation. After drying for 5 d in a lyophilizer, **2** (5.21 g, 19.7 mmol, 78%) was obtained as a white powder. <sup>1</sup>H NMR (400 MHz, DMSO-*d*<sub>6</sub>) δ: 7.70 (s, 2H), 5.52 (t, *J*=4.11 Hz, 2H), 4.48 (d, *J*=4.01 Hz, 4H).

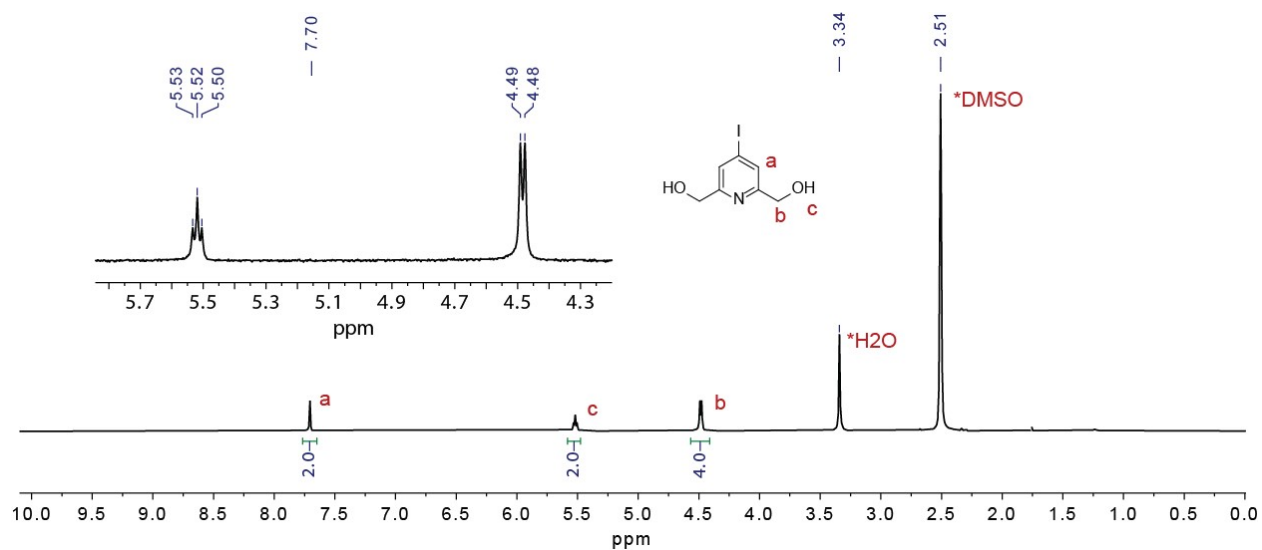

**Figure S1.** <sup>1</sup>H NMR (DMSO-*d*<sub>6</sub>) spectrum of **2**.

**Synthesis of 3.** Procedure for similar intermediate was followed.<sup>3</sup> A 250 mL round bottom flask was charged with **2** (5.22 g, 19.7 mmol), NaOH (3.21 g, 80.2 mmol), H<sub>2</sub>O (20 mL), and THF (20 mL) at 0 °C and stirred. A solution of tosyl chloride (16.9 g, 88.8 mmol) in THF (30 mL) was added dropwise to this mixture for ca. 10 min. The mixture was stirred at 0 °C for 2 h, and at room temperature for 2 h. The mixture was concentrated using rotary evaporation and H<sub>2</sub>O (60 mL) was added. The mixture was extracted with CH<sub>2</sub>Cl<sub>2</sub> (3X50 mL). The organic layer was dried (anhydrous Na<sub>2</sub>SO<sub>4</sub>) and filtered. The solvent was evaporated using rotary evaporation to obtain tan solid crystals, which were washed with diethyl ether (200 mL). The residual solvent was removed using an oil pump vacuum to obtain **3** (10.4 g, 18.1 mmol, 92%) as white crystals. **<sup>1</sup>H NMR** (400 MHz, CDCl<sub>3</sub>) δ: 7.81 (d, *J*=8.04 Hz, 4H), 7.64 (s, 2H), 7.36 (d, *J*=8.13 Hz, 4H), 5.01 (s, 4H), 2.47 (s, 6H); **<sup>13</sup>C** (101 MHz, CDCl<sub>3</sub>) δ: 154.1, 145.4, 132.5, 130.4, 130.0, 128.1, 107.0, 70.4, 21.7.

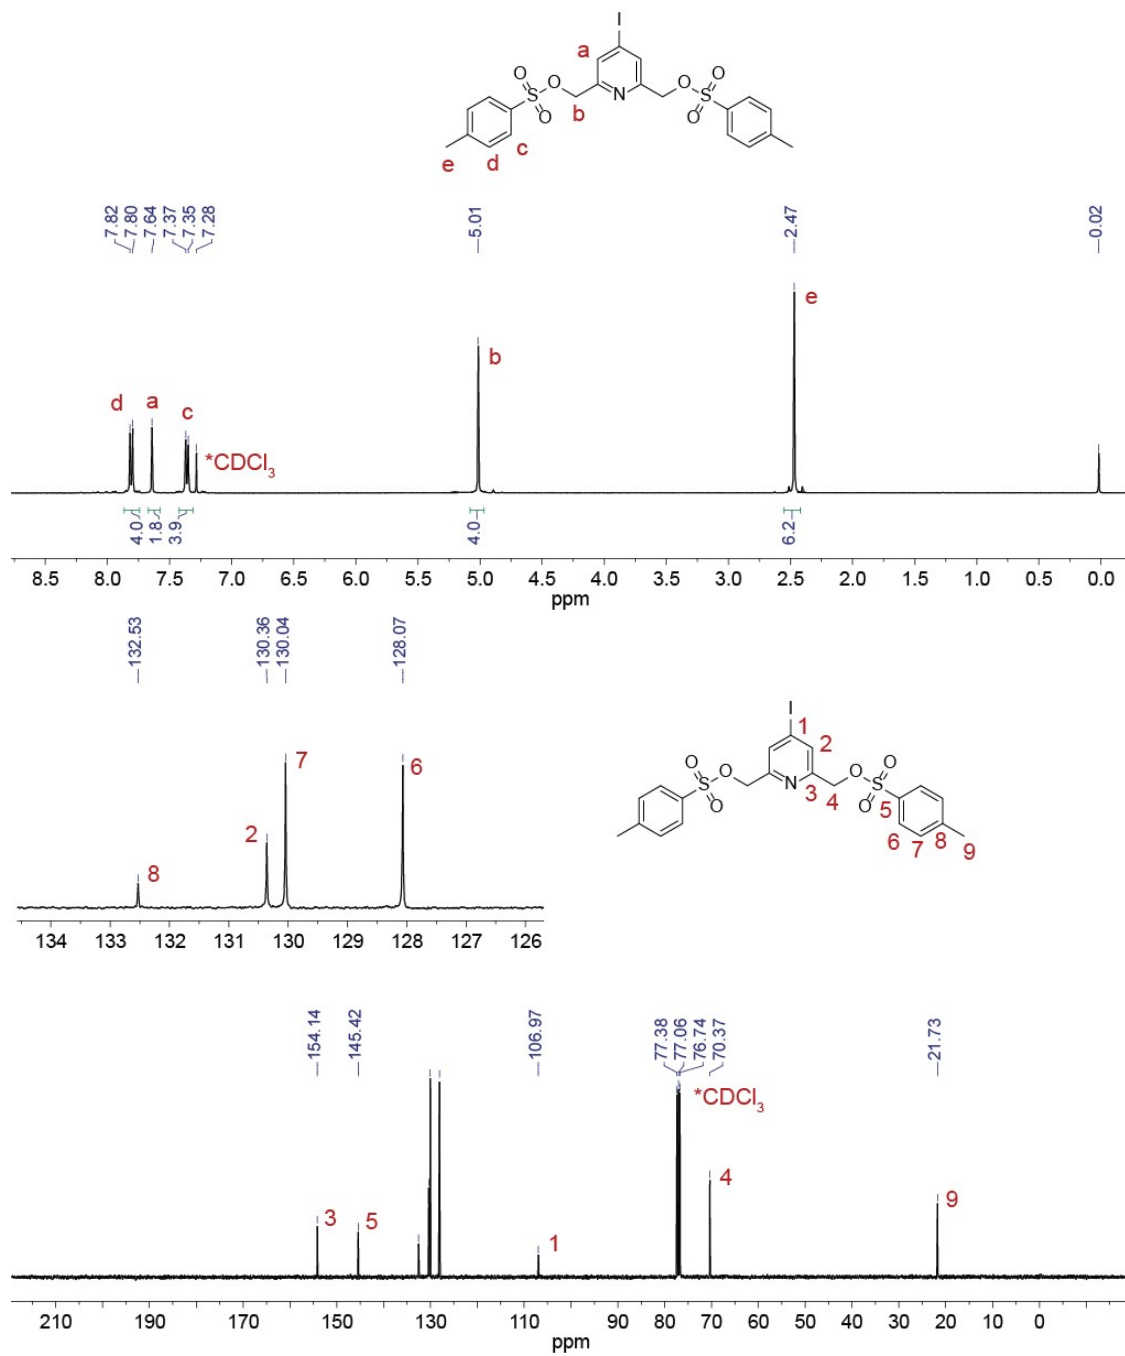

**Figure S2.**  $^1\text{H}$  (top) and  $^{13}\text{C}\{^1\text{H}\}$  (bottom) NMR ( $\text{CDCl}_3$ ) spectra of **3**.

**Synthesis of 4.** According to literature procedures.<sup>4</sup> A 500 mL round bottom flask was charged with tosyl chloride (4.01 g, 38.8 mmol), triethylamine (13.1 g, 13.0 mmol), and CH<sub>2</sub>Cl<sub>2</sub> (200 mL) at 0 °C. The solution was stirred for 10 min. Diethylenetriamine (4.002 g, 38.8 mmol) was added dropwise to the solution for ca. 30 min, and the reaction mixture was stirred overnight. The solvent was evaporated from the mixture to obtain a white solid, which was recrystallized from MeOH to obtain **4** (19.3 g, 34.1 mmol, 88%) as a white powder. <sup>1</sup>H NMR (400 MHz, acetone-*d*<sub>6</sub>) δ: 7.77 (d, *J*=8.02 Hz, 4H), 7.65 (d, *J*=12.0 Hz, 2H), 7.41 (m, 6H), 6.59 (t, *J*=3.89 Hz, 2H), 3.20 (m, 4H), 3.07 (q, *J*=8.0 Hz, 4H), 2.45 (m, 9H).

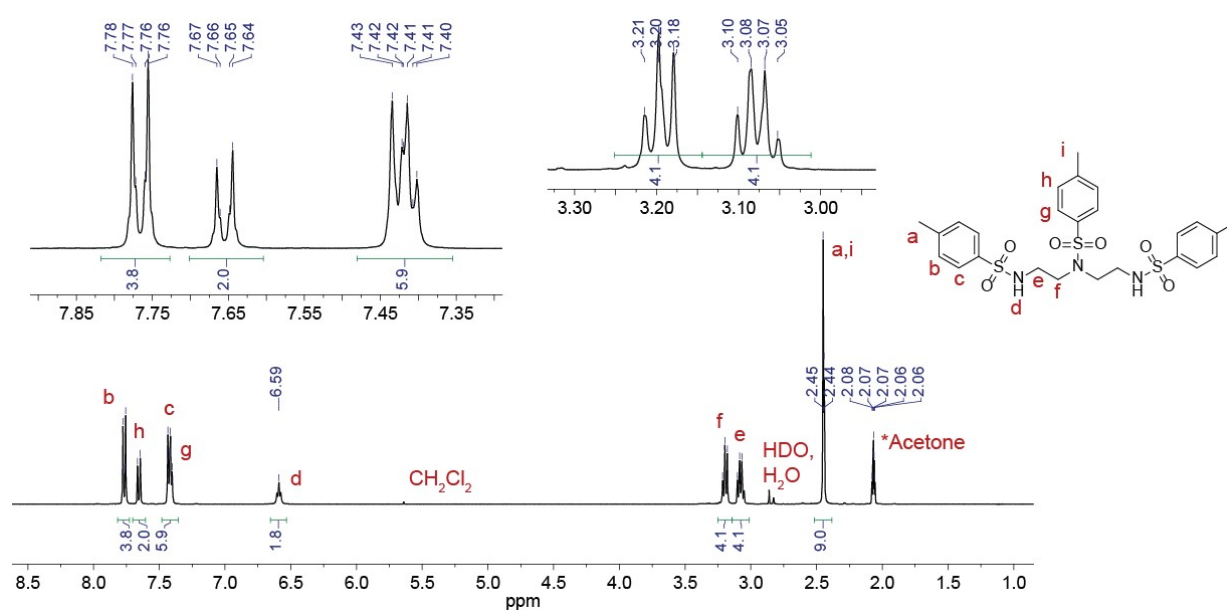

**Figure S3.** <sup>1</sup>H NMR (Acetone-*d*<sub>6</sub>) spectrum of **4**.

**Synthesis of 5.**<sup>5</sup> A 250 mL two-necked round bottom flask was charged with **4** (1.98 g, 3.55 mmol), Cs<sub>2</sub>CO<sub>3</sub> (3.42 g, 10.5 mmol), and anhydrous DMF (150 mL) under an N<sub>2</sub> atmosphere. **3** (2.04 g, 3.55 mmol) in DMF (25 mL) was added dropwise to the mixture for ca. 10 min and stirred. After 16 h, the solvent was removed using rotary evaporation to obtain a tan solid. Water (50.0 mL) was added and the mixture was extracted with CH<sub>2</sub>Cl<sub>2</sub> (3 x 30 mL). The solvent was removed from the organic phase by rotary evaporation to obtain **5** (2.49 g, 3.13 mmol, 88%) as a tan powder. *Note: This product was >95% pure (<sup>1</sup>H NMR). To obtain a pure sample, the final product obtained can be washed multiple times with small amounts of*

*EtOAc*. Since the desired product is slightly soluble in *EtOAc*, a small yield is lost.  $^1\text{H}$  NMR (400 MHz,  $\text{DMSO-}d_6$ )  $\delta$ : 7.72 – 7.68 (m, 8H), 7.48-7.44 (m, 6H), 4.31 (s, 4H), 3.60 (t,  $J=4.06$  Hz, 4H), 3.11 (t,  $J=4.12$  Hz, 4H) 2.43 (s, 6H) 2.42 (s, 3H);  $^{13}\text{C}$  (101 MHz,  $\text{DMSO-}d_6$ )  $\delta$ :157.8, 144.1, 143.8, 138.4, 135.4, 131.1, 130.5, 127.5, 127.1, 108.4, 54.5, 49.7, 46.1, 21.52, 21.48. **Elemental analysis:** Calc. (Found) for **5**: C, 48.36 (48.32); H, 4.44 (4.40); N, 7.05 (6.97). **HRMS:** calc. (found) ( $\text{M}+\text{H}^+$ ,  $m/z$ ) 795.0836 (795.0845)

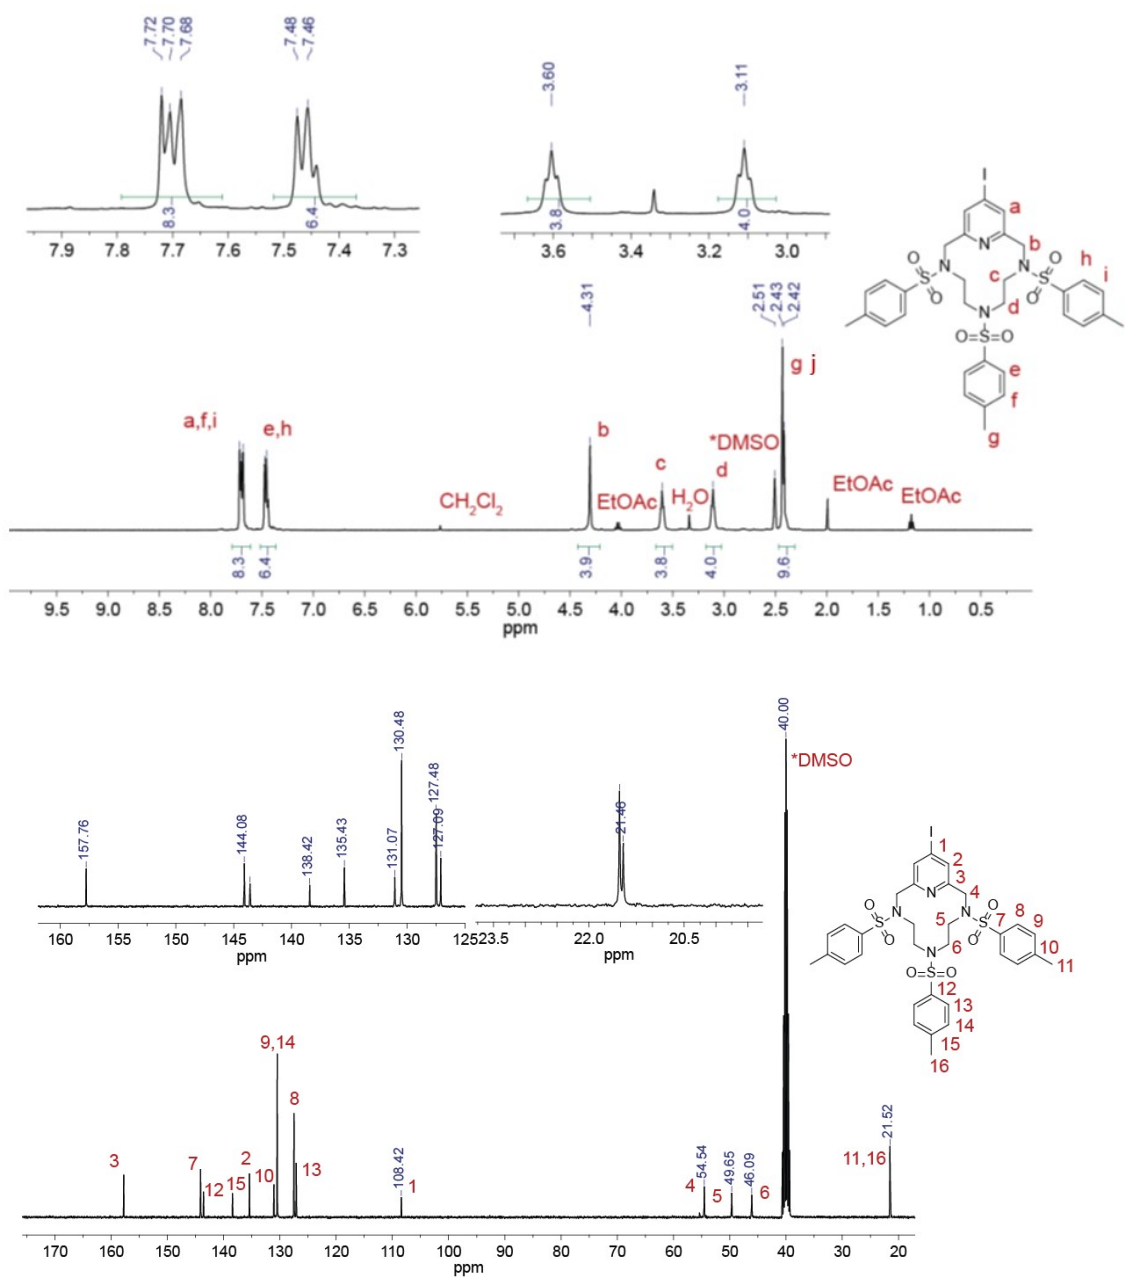

**Figure S4.**  $^1\text{H}$  (top) and  $^{13}\text{C}\{^1\text{H}\}$  (bottom) NMR ( $\text{DMSO-}d_6$ ) spectra of **5**.

**Synthesis of L4·3HCl.** Previously reported deprotection (or detosylation) methods were used to design the synthesis of L4.<sup>5</sup> A 100 mL round bottom flask was charged with **5** (0.641 g, 0.811 mmol) and cc. H<sub>2</sub>SO<sub>4</sub> (10 ml). The mixture was stirred at 120 °C. After 3 h, the oil bath was removed and the mixture was allowed to cool to room temperature. The mixture was then washed with diethyl ether (200 mL) to remove the organic impurities. 1 M NaOH was added to the aqueous fraction until the pH of the solution reached 12. CH<sub>2</sub>Cl<sub>2</sub> (100 mL) was added to the flask and the mixture was extracted with CH<sub>2</sub>Cl<sub>2</sub> (2 × 50 mL). The solvent was removed from the organic extracts using rotary evaporation to obtain a tan oil. The least amount of cc. HCl (1 mL) was added to the mixture. Anhydrous EtOH (5 mL) and diethyl ether (20 mL) were then added dropwise to the flask, and a white solid precipitated. The solid was collected by filtration, washed with CH<sub>2</sub>Cl<sub>2</sub> (20 mL), and dried using an oil pump vacuum to obtain **L4·HCl** (0.232 g, 0.532 mmol, 65%) as white crystals. **<sup>1</sup>H NMR** (400 MHz, D<sub>2</sub>O) 7.89 (s, 2H), 4.50 (s, 4H), 3.27 (t, *J*=8.10 Hz, 4H), 3.13 (t, *J*=7.96 Hz, 4H); **<sup>13</sup>C** (101 MHz, D<sub>2</sub>O) 150.2, 132.8, 108.8, 48.5, 44.6, 43.4. **Elemental analysis:** Calc. (Found) for C<sub>11</sub>H<sub>21</sub>IN<sub>4</sub>Na<sub>4</sub>Cl<sub>8</sub>: C, 18.56(18.82); H, 2.97(3.16); N, 7.87(7.83). **HRMS:** calc. (found) (M+H<sup>+</sup>, m/z) 333.0571 (333.0559).



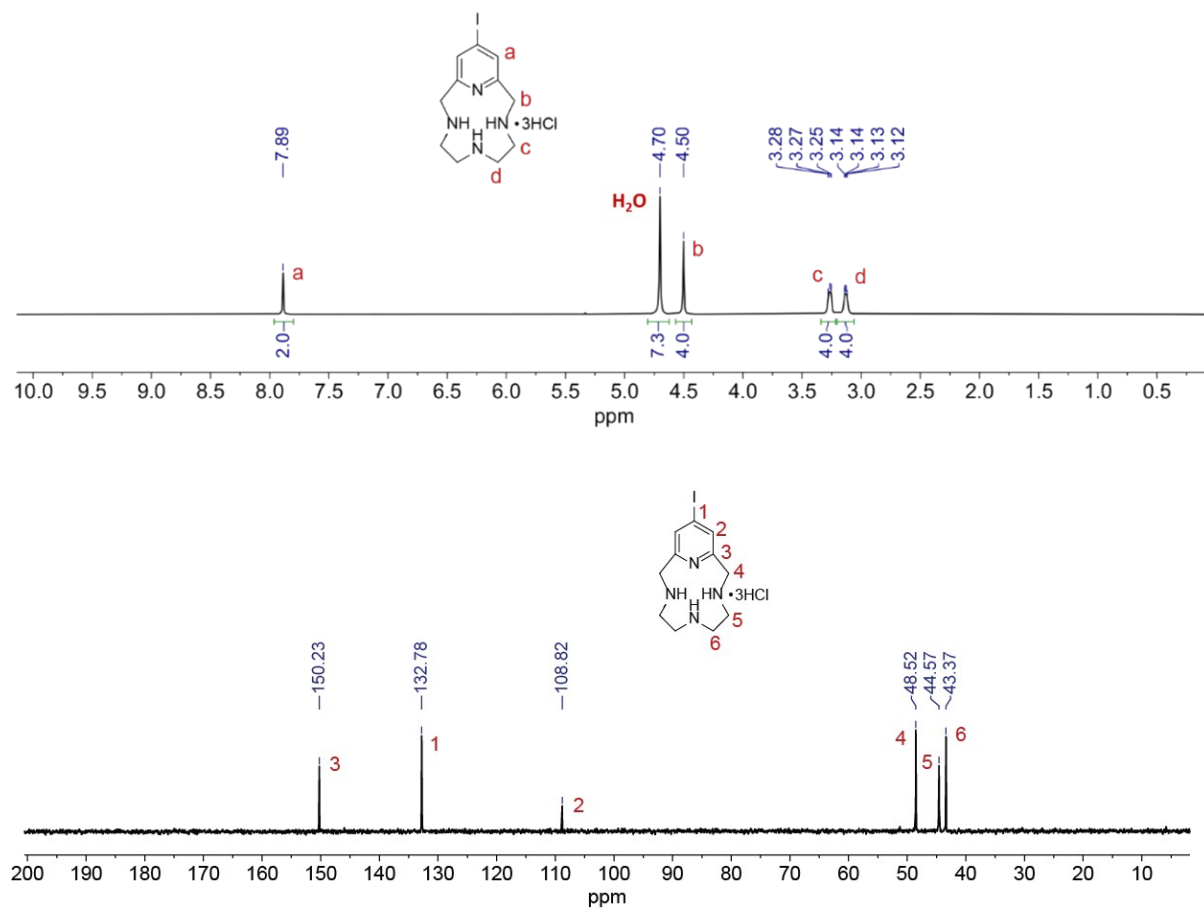

**Figure S5.**  $^1\text{H}$  (top) and  $^{13}\text{C}\{^1\text{H}\}$  (bottom) NMR ( $\text{D}_2\text{O}$ ) spectra of  $\mathbf{6}\cdot\text{HCl}$ .

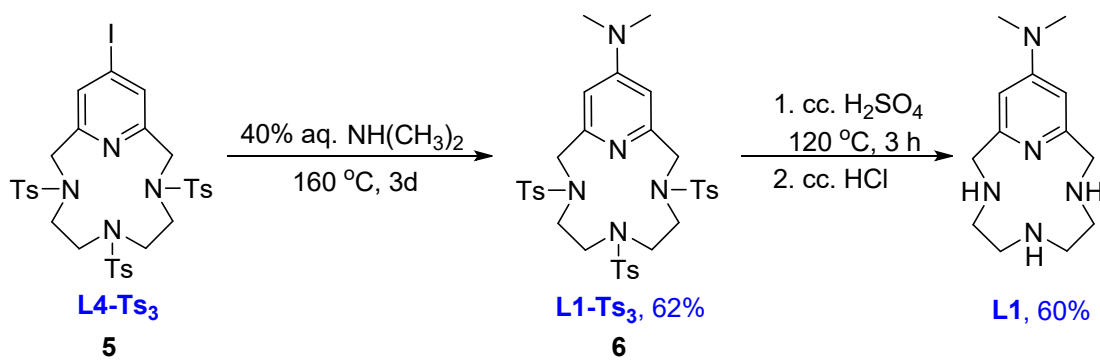

**Scheme S2.** Synthetic route to  $\text{NMe}_2\text{PyN}_3$  macrocycle.

**Synthesis of 6.** Methods previously reported were used to design the synthesis of **6**.<sup>5</sup> A 75 mL pressure flask was charged with **5** (0.618 g, 0.755 mmol), in 40% aqueous dimethyl amine solution (10.0 mL, 75.6 mmol) the flask was sealed and placed under 160 °C. After 3 days the mixture was left to cool to room temperature, resulting in a white precipitate. The solid was collected by filtration, washed with CH<sub>2</sub>Cl<sub>2</sub> (20 mL), and dried using an oil pump vacuum to obtain **6** (0.338 g, 0.462 mmol, 61%) as white crystals. **<sup>1</sup>H NMR** (400 MHz, CDCl<sub>3</sub>) 7.71 (d, *J*=8.24 Hz, 3H), 7.67 (d, *J*=8.24 Hz, 3H), 7.33 (d, *J*=7.96 Hz, 3H), 7.28(d, *J*=8.00 Hz, 3H) 6.56 (s, 2H), 4.14 (br s, 4H), 3.33 (br, 4H), 2.99 (s, 6H) 2.75 (s, 4H), 2.44 (s, 6H), 2.42 (s, 3H); **<sup>13</sup>C** (101 MHz, CDCl<sub>3</sub>)δ:156.2, 154.9, 143.7, 143.4, 136.2, 135.2, 129.9, 129.8, 127.2, 127.1, 106.7, 55.4, 47.0, 39.4, 21.6; **Elemental analysis:** Calc. (Found) for C<sub>34</sub>H<sub>41</sub>N<sub>5</sub>O<sub>6</sub>S<sub>3</sub>: C, 57.36(56.71); H,5.81(5.75); N, 9.84(9.76). **HRMS:** calc. (found) (M+H<sup>+</sup>, m/z) 712.2292 (712.2290).

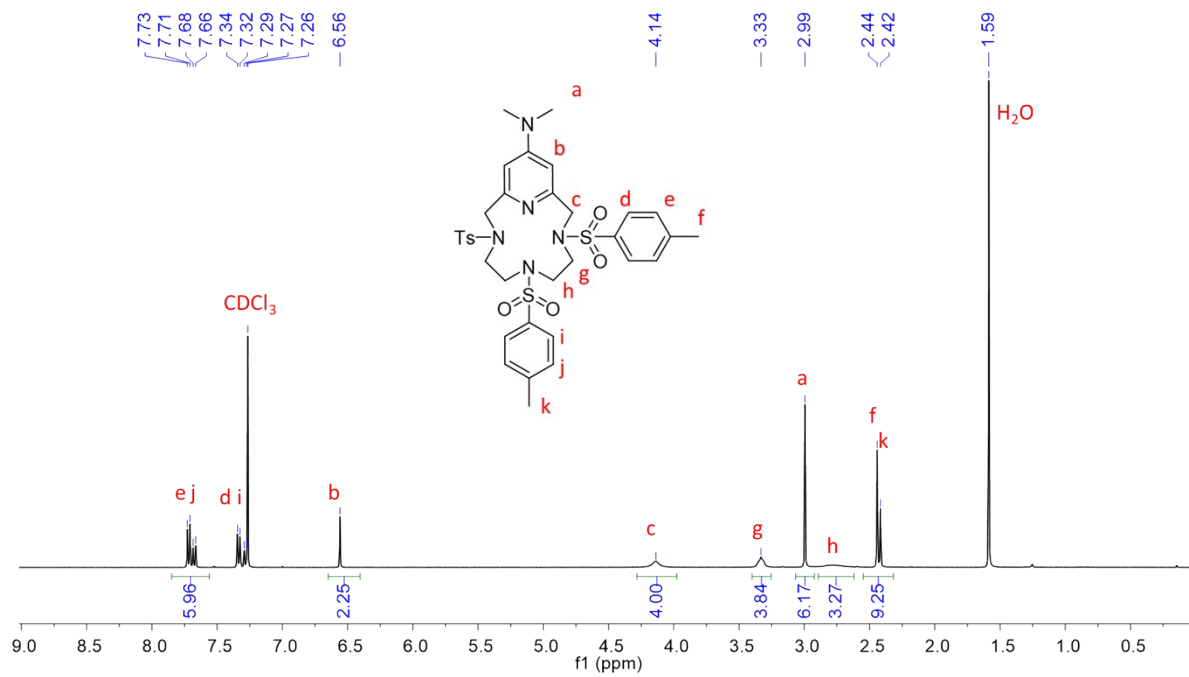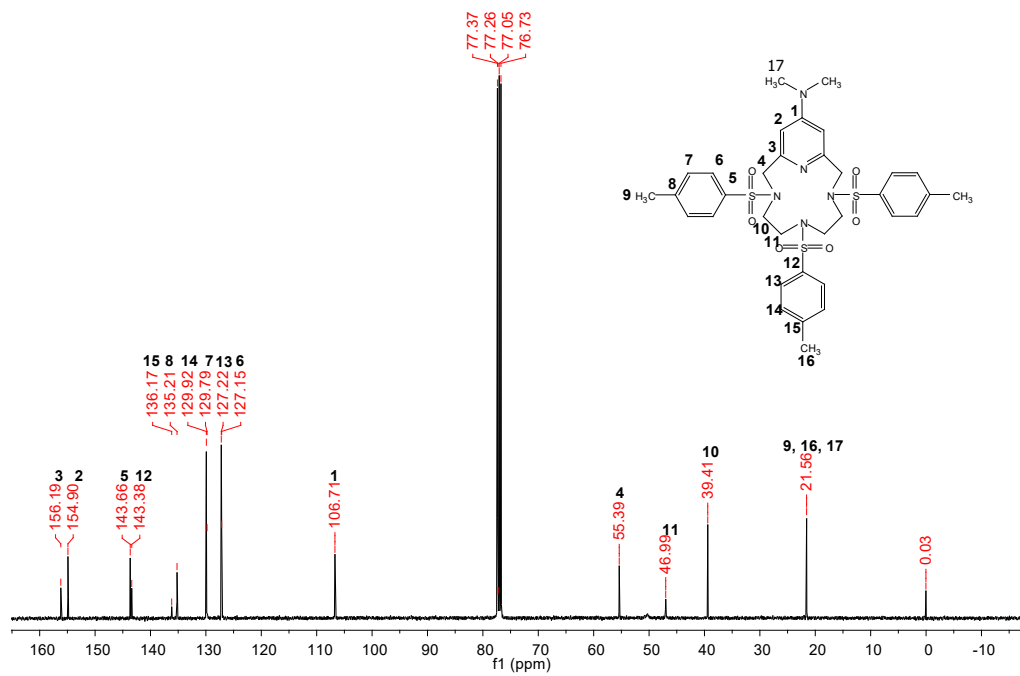

**Fig**

re S6. <sup>1</sup>H (top) and <sup>13</sup>C{<sup>1</sup>H} (bottom) NMR of **6**.

**Synthesis of L1·3HCl.**<sup>5</sup> A 100 mL round bottom flask was charged with **6** (0.743 g, 1.04 mmol) and cc. H<sub>2</sub>SO<sub>4</sub> (10 ml). The mixture was stirred at 120 °C. After 3 h, the oil bath was removed and the mixture was allowed to cool to room temperature. The mixture was then washed with diethyl ether (200 mL) to remove the organic impurities. 1 M NaOH was added to the aqueous fraction until the pH of the solution reached 12. CH<sub>2</sub>Cl<sub>2</sub> (100 mL) was added to the flask and the mixture was extracted with CH<sub>2</sub>Cl<sub>2</sub> (2 × 50 mL). The solvent was removed from the organic extracts using rotary evaporation to obtain a tan oil. The least amount of cc. HCl (2 mL) was added to the mixture. Anhydrous EtOH (5 mL) and diethyl ether (20 mL) were added dropwise to the flask, and a white solid precipitated. The solid was collected by filtration, washed with CH<sub>2</sub>Cl<sub>2</sub> (20 mL), and dried using an oil pump vacuum to obtain **L1·HCl** (0.224 g, 0.630 mmol, 60%) as white crystals. <sup>1</sup>H NMR (400 MHz, D<sub>2</sub>O) 6.63 (s, 2H), 4.31 (s, 4H), 3.39-3.41 (m, 4H), 3.32-3.34 (m, 4H), 2.93 (s, 6H); <sup>13</sup>C (101 MHz, D<sub>2</sub>O) 156.7, 149.1, 133.1, 106.2, 49.1, 43.0, 38.8. **Elemental analysis:** Calc. (Found) for C<sub>27</sub>H<sub>58</sub>N<sub>10</sub>OCl<sub>8</sub>: C, 39.43(39.14); H, 7.11(7.46); N, 17.25(17.03). **HRMS:** calc. (found) (M+H<sup>+</sup>, m/z) 250.2026 (250.2019)

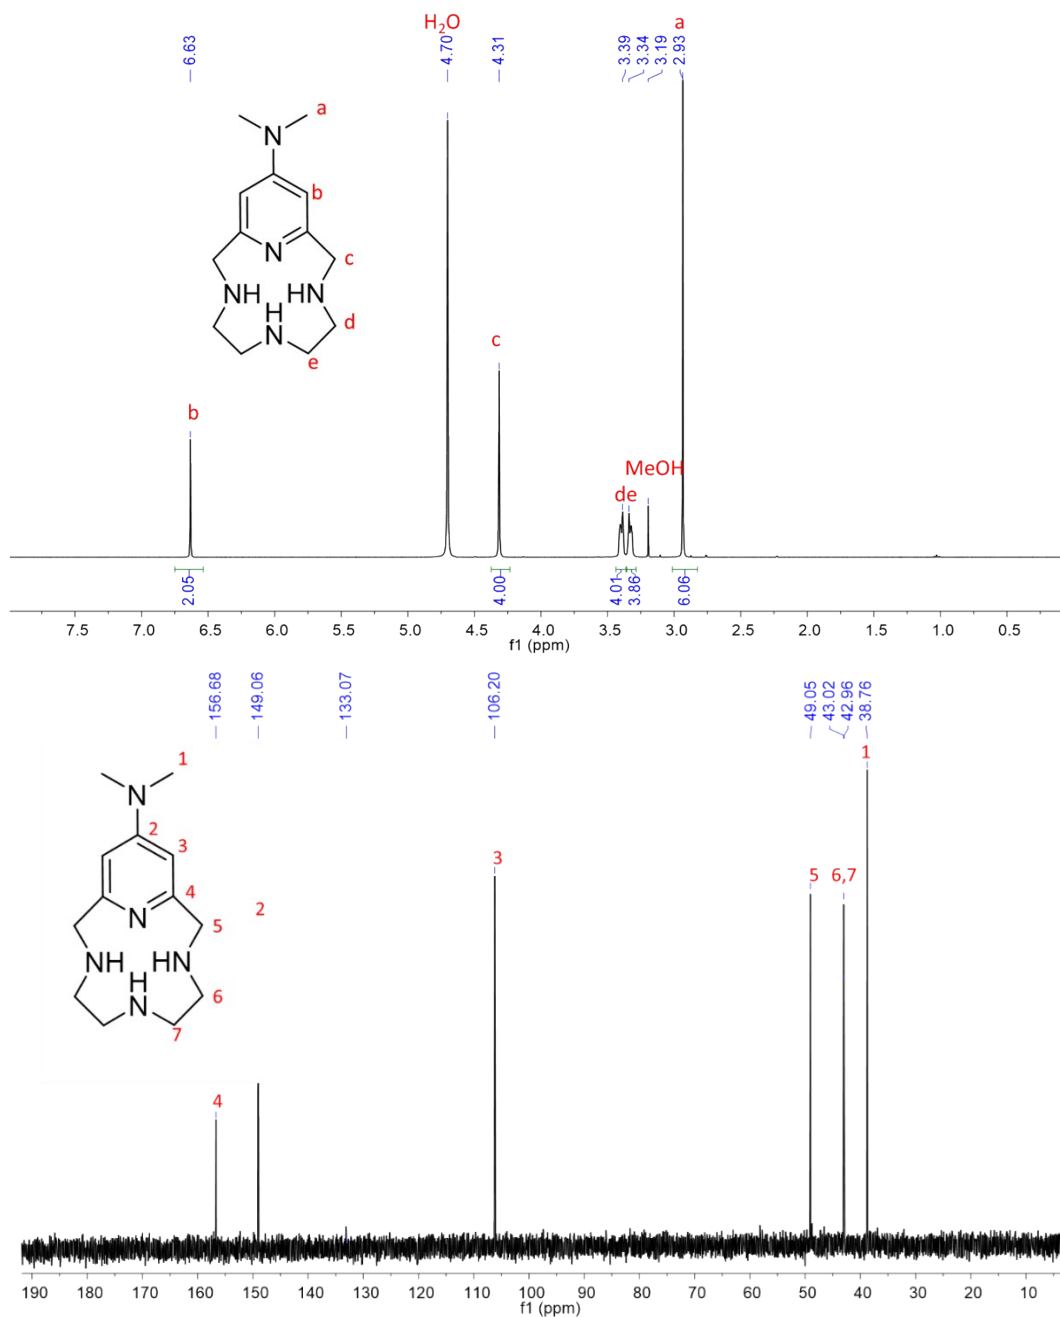

**Figure S7.**  $^1\text{H}$  (top) and  $^{13}\text{C}\{^1\text{H}\}$  (bottom) NMR (D<sub>2</sub>O) spectra of L1.

## POTENTIOMETRIC RESULTS

**Table S1.** Binding stability constants ( $\log \beta$ ) for ligands **L1**, **L2**, and **L4** with Fe(II)

|        |                                                               | <b>L1</b> (NMe <sub>2</sub> ) | <b>L2</b> (OMe) | <b>L4</b> (I) |
|--------|---------------------------------------------------------------|-------------------------------|-----------------|---------------|
| Fe(II) | $[\text{ML}]/([\text{M}][\text{L}])$                          | 13.14(4)                      | 13.01 (4)       | 13.71 (3)     |
|        | $[\text{MHL}]/([\text{ML}][\text{H}])$                        | 4.34(10)                      | 3.97 (10)       | 3.99 (7)      |
|        | $[\text{ML}]/([\text{MLOH}][\text{H}])$                       | 8.92(9)                       | 8.74 (7)        | 9.26 (5)      |
|        | $[\text{ML}(\text{OH})]/([\text{ML}(\text{OH})_2][\text{H}])$ | -                             | 11.60 (9)       | 12.26 (5)     |

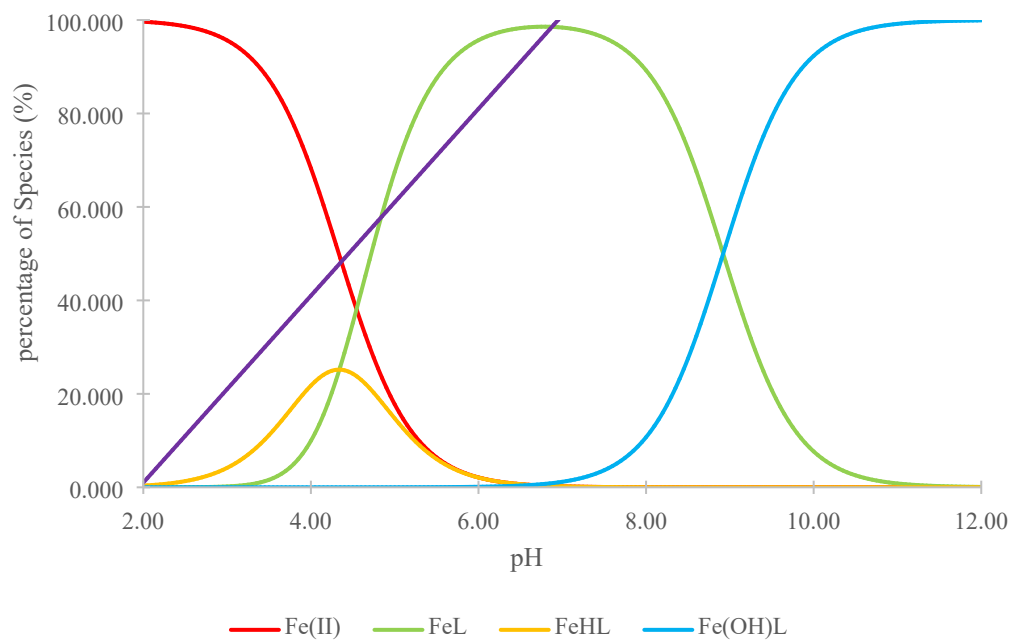

**Figure S8.** Species distribution curves for [FeL1] ( $I = 0.15$  M NaCl,  $T = 25$  °C,  $[\text{L1}]_{\text{tot}} = [\text{Fe}]_{\text{tot}} = 2$  mM).

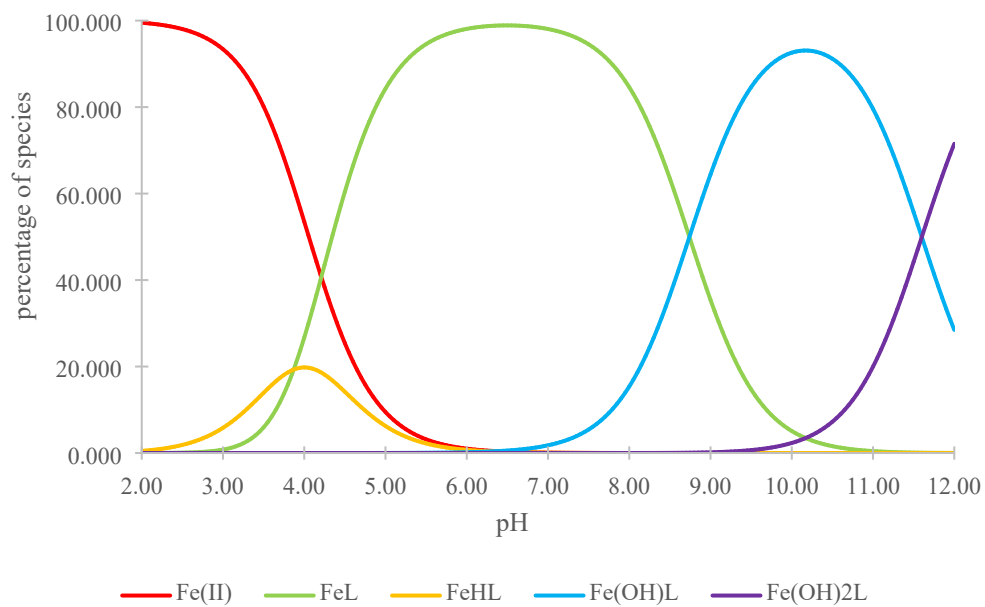

**Figure S9.** Species distribution curves for  $[\text{FeL}_2]$  ( $I = 0.15 \text{ M NaCl}$ ,  $T = 25 \text{ }^\circ\text{C}$ ,  $[\text{L1}]_{\text{tot}} = [\text{Fe}]_{\text{tot}} = 2 \text{ mM}$ ).

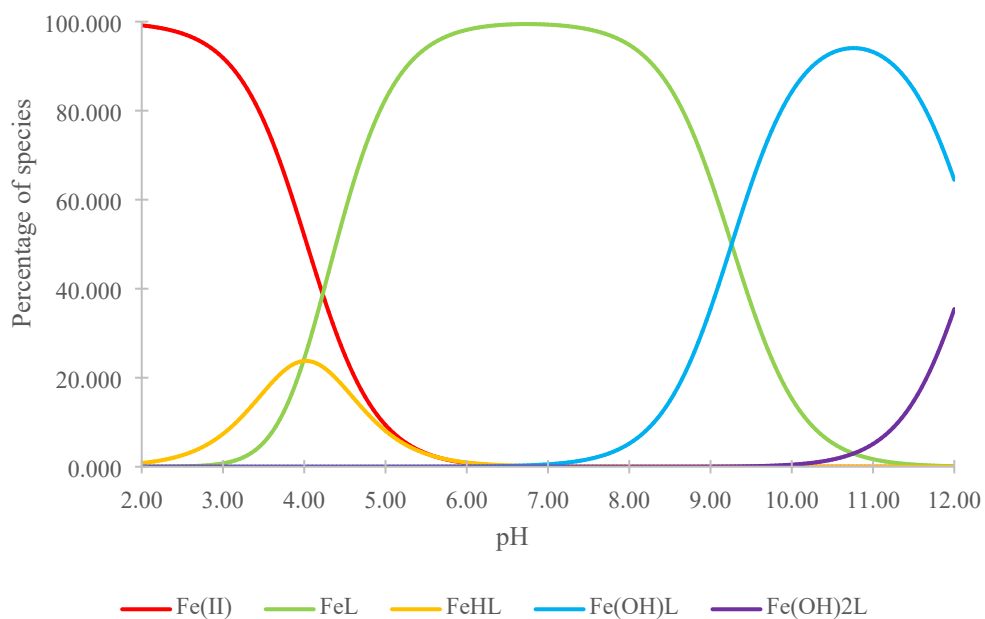

**Figure S10.** Species distribution curves for  $[\text{FeL}_4]$  ( $I = 0.15 \text{ M NaCl}$ ,  $T = 25 \text{ }^\circ\text{C}$ ,  $[\text{L1}]_{\text{tot}} = [\text{Fe}]_{\text{tot}} = 2 \text{ mM}$ ).

## X-RAY DIFFRACTION RESULTS

**Table S2.** Crystal data, intensity collections, and structure refinement parameters for **FeL1**, **FeL2** and **FeL4**.

| Complex                                    | FeL1                                                                                             | FeL2                                                                                             | FeL4                                                                                              |
|--------------------------------------------|--------------------------------------------------------------------------------------------------|--------------------------------------------------------------------------------------------------|---------------------------------------------------------------------------------------------------|
| <b>Formula</b>                             | C <sub>14</sub> H <sub>23</sub> Cl <sub>2</sub> F <sub>3</sub> FeN <sub>5</sub> O <sub>3</sub> S | C <sub>13</sub> H <sub>20</sub> Cl <sub>2</sub> F <sub>3</sub> FeN <sub>4</sub> O <sub>4</sub> S | C <sub>12</sub> H <sub>17</sub> Cl <sub>2</sub> F <sub>3</sub> FeIN <sub>4</sub> O <sub>3</sub> S |
| <b>M.W.</b>                                | 525.18                                                                                           | 512.140                                                                                          | 608.58                                                                                            |
| <b>Unit cell</b>                           | Orthorhombic                                                                                     | monoclinic                                                                                       | Monoclinic                                                                                        |
| <b>Space group</b>                         | P2 <sub>1</sub> 2 <sub>1</sub> 2 <sub>1</sub>                                                    | <i>P</i> 2 <sub>1</sub> / <i>c</i>                                                               | P2 <sub>1</sub> / <i>n</i>                                                                        |
| <b>a (Å)</b>                               | 6.8637(4)                                                                                        | 7.0308(5)                                                                                        | 25.1399(17)                                                                                       |
| <b>b (Å)</b>                               | 8.6169(5)                                                                                        | 13.8067(9)                                                                                       | 8.2657(5)                                                                                         |
| <b>c (Å)</b>                               | 36.4304(19)                                                                                      | 20.6288(14)                                                                                      | 31.080(2)                                                                                         |
| <b>α</b>                                   | 90                                                                                               | 90                                                                                               | 90                                                                                                |
| <b>β</b>                                   | 90                                                                                               | 97.035(3)                                                                                        | 111.259(2)                                                                                        |
| <b>γ</b>                                   | 90                                                                                               | 90                                                                                               | 90                                                                                                |
| <b>Volume (Å<sup>3</sup>)</b>              | 2154.6(2)                                                                                        | 1987.4(2)                                                                                        | 6018.9(7)                                                                                         |
| <b>Z</b>                                   | 4                                                                                                | 4                                                                                                | 12                                                                                                |
| <b>D<sub>calc.</sub>(g/cm<sup>3</sup>)</b> | 1.619                                                                                            | 1.712                                                                                            | 2.015                                                                                             |
| <b>Reflections Collected</b>               | 54526                                                                                            | 164665                                                                                           | 386474                                                                                            |
| <b>Independent Reflections</b>             | 3778                                                                                             | 3832                                                                                             | 16935                                                                                             |
| <b>R<sub>int</sub></b>                     | 0.0431                                                                                           | 0.0391                                                                                           | 0.0534                                                                                            |
| <b>Completeness to θ</b>                   | 99                                                                                               | 97.89                                                                                            | 99                                                                                                |
| <b>Goof</b>                                | 1.132                                                                                            | 1.0046                                                                                           | 1.269                                                                                             |
| <b>R1,wR2 [I&gt;2sigma(I)]</b>             | 0.1186, 0.2586                                                                                   | 0.0481, 0.1273                                                                                   | 0.0371, 0.0678                                                                                    |
| <b>R1, wR2</b>                             | 0.1189, 0.2587                                                                                   | 0.0480, 0.1272                                                                                   | 0.0410, 0.0690                                                                                    |



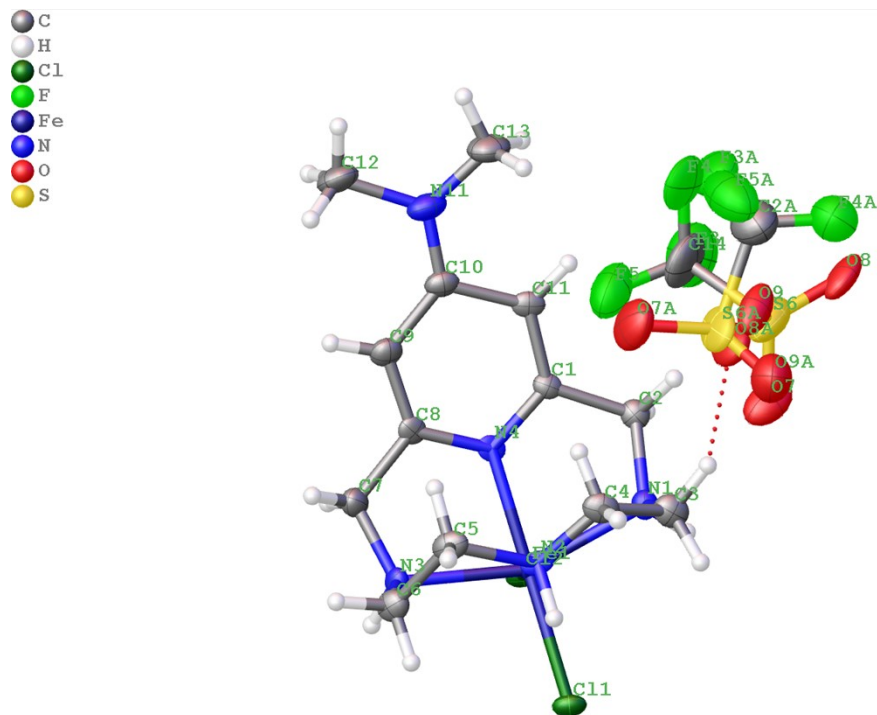

>>

**Figure S11.** Solid state structure of **FeL1** showing atom labeling.

**Table S3.** Bond Lengths for **FeL1**.

| Atom | Atom | Length/Å  | Atom | Atom | Length/Å  |
|------|------|-----------|------|------|-----------|
| Fe1  | N4   | 2.046(11) | C1   | C2   | 1.51(3)   |
| Fe1  | N3   | 2.187(15) | N2   | C5   | 1.55(2)   |
| Fe1  | N1   | 2.170(16) | N2   | C4   | 1.40(3)   |
| Fe1  | Cl2  | 2.318(4)  | C5   | C6   | 1.59(3)   |
| Fe1  | Cl1  | 2.298(4)  | C3   | C4   | 1.40(3)   |
| Fe1  | N2   | 2.180(12) | C14  | F3   | 1.312(17) |
| N4   | C8   | 1.35(2)   | C14  | F4   | 1.335(17) |
| N4   | C1   | 1.36(2)   | C14  | F5   | 1.323(17) |
| N3   | C7   | 1.47(3)   | C14  | S6   | 1.80(2)   |
| N3   | C6   | 1.48(3)   | S6   | O7   | 1.400(15) |
| C8   | C9   | 1.36(3)   | S6   | O8   | 1.443(16) |
| C8   | C7   | 1.49(3)   | S6   | O9   | 1.453(16) |
| N1   | C2   | 1.55(3)   | S6A  | C2A  | 1.83(3)   |
| N1   | C3   | 1.52(3)   | S6A  | O7A  | 1.42(2)   |
| C9   | C10  | 1.43(3)   | S6A  | O8A  | 1.44(2)   |
| N11  | C10  | 1.30(2)   | S6A  | O9A  | 1.42(2)   |
| N11  | C12  | 1.53(3)   | C2A  | F3A  | 1.32(2)   |
| N11  | C13  | 1.40(3)   | C2A  | F4A  | 1.31(2)   |
| C11  | C1   | 1.38(3)   | C2A  | F5A  | 1.32(2)   |
| C11  | C10  | 1.47(3)   |      |      |           |

**Table S4.** Bond Angles for **FeL1**.

| <b>Atom Atom Atom</b> | <b>Angle/°</b> | <b>Atom Atom Atom</b> | <b>Angle/°</b> |
|-----------------------|----------------|-----------------------|----------------|
| N4 Fe1 N3             | 78.5(6)        | C1 C2 N1              | 108.7(14)      |
| N4 Fe1 N1             | 77.7(6)        | C9 C10 C11            | 115.2(14)      |
| N4 Fe1 Cl2            | 92.7(2)        | N11 C10 C9            | 128(2)         |
| N4 Fe1 Cl1            | 175.8(2)       | N11 C10 C11           | 116(2)         |
| N4 Fe1 N2             | 87.1(4)        | C5 N2 Fe1             | 109.1(11)      |
| N3 Fe1 Cl2            | 100.3(5)       | C4 N2 Fe1             | 109.3(12)      |
| N3 Fe1 Cl1            | 100.5(5)       | C4 N2 C5              | 117.1(13)      |
| N1 Fe1 N3             | 149.3(5)       | N2 C5 C6              | 102.5(15)      |
| N1 Fe1 Cl2            | 99.9(5)        | C4 C3 N1              | 109.5(18)      |
| N1 Fe1 Cl1            | 101.8(5)       | C3 C4 N2              | 115.2(18)      |
| N1 Fe1 N2             | 78.5(7)        | N3 C6 C5              | 109.6(17)      |
| Cl1 Fe1 Cl2           | 91.49(15)      | F3 C14 F4             | 106(2)         |
| N2 Fe1 N3             | 81.3(7)        | F3 C14 F5             | 110(2)         |
| N2 Fe1 Cl2            | 178.4(5)       | F3 C14 S6             | 110.9(18)      |
| N2 Fe1 Cl1            | 88.7(3)        | F4 C14 S6             | 112.2(16)      |
| C8 N4 Fe1             | 119.2(12)      | F5 C14 F4             | 104(2)         |
| C8 N4 C1              | 118.6(12)      | F5 C14 S6             | 112.7(18)      |
| C1 N4 Fe1             | 121.2(12)      | O7 S6 C14             | 113.1(14)      |
| C7 N3 Fe1             | 109.9(12)      | O7 S6 O8              | 112.9(17)      |
| C7 N3 C6              | 110.0(17)      | O7 S6 O9              | 112.4(16)      |
| C6 N3 Fe1             | 106.3(13)      | O8 S6 C14             | 105.1(14)      |
| N4 C8 C9              | 122.7(18)      | O8 S6 O9              | 110.7(17)      |
| N4 C8 C7              | 114.6(16)      | O9 S6 C14             | 101.9(12)      |
| C9 C8 C7              | 122.6(18)      | O7A S6A C2A           | 103(2)         |
| C2 N1 Fe1             | 109.2(12)      | O7A S6A O8A           | 116(2)         |
| C3 N1 Fe1             | 108.9(12)      | O8A S6A C2A           | 102.9(18)      |
| C3 N1 C2              | 113.4(16)      | O9A S6A C2A           | 106(2)         |
| C8 C9 C10             | 121.5(19)      | O9A S6A O7A           | 116(2)         |
| C10 N11 C12           | 120(2)         | O9A S6A O8A           | 112(2)         |
| C10 N11 C13           | 123(2)         | F3A C2A S6A           | 110(2)         |
| C13 N11 C12           | 116.1(15)      | F4A C2A S6A           | 110(2)         |
| C1 C11 C10            | 118.4(17)      | F4A C2A F3A           | 111(3)         |
| N4 C1 C11             | 123.7(17)      | F4A C2A F5A           | 112(3)         |
| N4 C1 C2              | 113.7(15)      | F5A C2A S6A           | 108(2)         |
| C11 C1 C2             | 122.5(17)      | F5A C2A F3A           | 105(3)         |
| N3 C7 C8              | 112.7(16)      |                       |                |

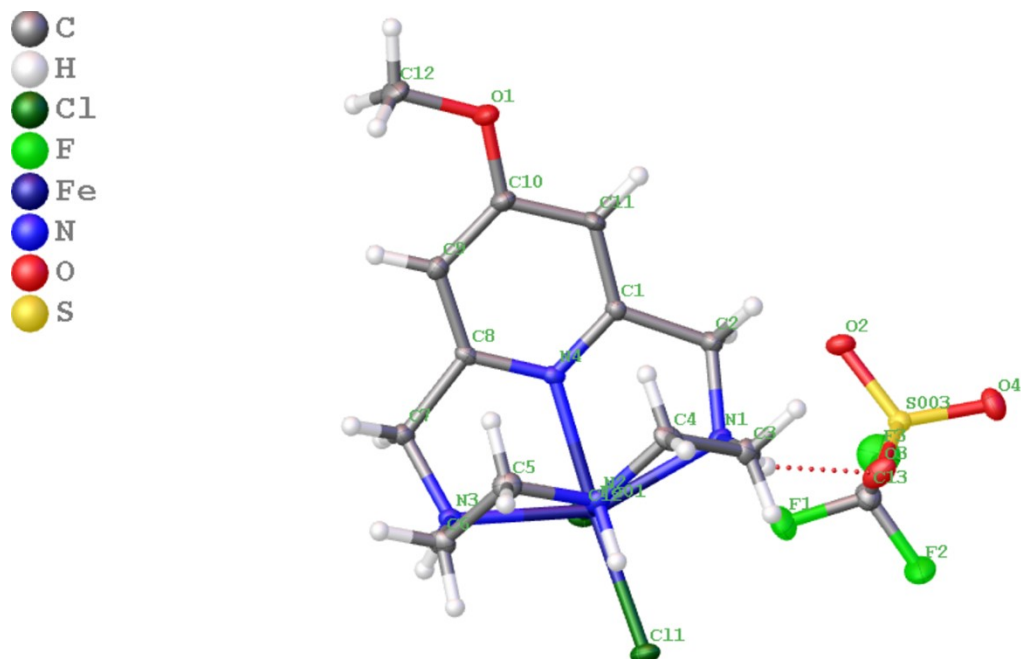

**Figure S12.** Solid state structure of **FeL2** showing atom labeling.

**Table S5.** Bond Lengths for **FeL2**.

| Atom | Atom | Length/Å   | Atom | Atom | Length/Å |
|------|------|------------|------|------|----------|
| Fe01 | C12  | 2.2708(11) | N2   | C5   | 1.469(5) |
| Fe01 | C11  | 2.2776(11) | O1   | C10  | 1.343(5) |
| Fe01 | N1   | 2.167(4)   | O1   | C12  | 1.444(5) |
| Fe01 | N2   | 2.189(3)   | N3   | C6   | 1.492(5) |
| Fe01 | N3   | 2.183(3)   | N3   | C7   | 1.486(5) |
| Fe01 | N4   | 2.099(3)   | N4   | C1   | 1.349(5) |
| S003 | O3   | 1.447(3)   | N4   | C8   | 1.341(5) |
| S003 | O4   | 1.437(3)   | C1   | C2   | 1.508(6) |
| S003 | O2   | 1.451(3)   | C1   | C11  | 1.377(6) |
| S003 | C13  | 1.821(5)   | C8   | C7   | 1.512(5) |
| F2   | C13  | 1.339(5)   | C8   | C9   | 1.386(6) |
| F1   | C13  | 1.333(5)   | C6   | C5   | 1.531(6) |
| F3   | C13  | 1.341(5)   | C11  | C10  | 1.393(6) |
| N1   | C2   | 1.487(5)   | C10  | C9   | 1.400(6) |
| N1   | C3   | 1.497(5)   | C4   | C3   | 1.522(6) |
| N2   | C4   | 1.482(5)   |      |      |          |

**Table S6.** Bond Angles for **FeL2**.

| Atom | Atom | Atom | Angle/°    | Atom | Atom | Atom | Angle/°  |
|------|------|------|------------|------|------|------|----------|
| Cl1  | Fe01 | Cl2  | 96.37(4)   | C7   | N3   | Fe01 | 110.7(2) |
| N1   | Fe01 | Cl2  | 101.46(9)  | C7   | N3   | C6   | 113.3(3) |
| N1   | Fe01 | Cl1  | 99.04(10)  | C1   | N4   | Fe01 | 119.7(3) |
| N2   | Fe01 | Cl2  | 176.44(10) | C8   | N4   | Fe01 | 119.7(3) |
| N2   | Fe01 | Cl1  | 86.69(10)  | C8   | N4   | C1   | 120.0(3) |
| N2   | Fe01 | N1   | 79.80(13)  | C2   | C1   | N4   | 114.1(3) |
| N3   | Fe01 | Cl2  | 98.80(9)   | C11  | C1   | N4   | 121.6(4) |
| N3   | Fe01 | Cl1  | 104.12(10) | C11  | C1   | C2   | 124.3(4) |
| N3   | Fe01 | N1   | 147.15(13) | C7   | C8   | N4   | 114.0(3) |
| N3   | Fe01 | N2   | 78.63(13)  | C9   | C8   | N4   | 122.0(4) |
| N4   | Fe01 | Cl2  | 92.47(9)   | C9   | C8   | C7   | 124.0(4) |
| N4   | Fe01 | Cl1  | 170.85(9)  | C5   | C6   | N3   | 108.9(3) |
| N4   | Fe01 | N1   | 76.82(13)  | C1   | C2   | N1   | 110.7(3) |
| N4   | Fe01 | N2   | 84.55(13)  | C10  | C11  | C1   | 118.6(4) |
| N4   | Fe01 | N3   | 76.72(13)  | C11  | C10  | O1   | 116.0(4) |
| O4   | S003 | O3   | 115.6(2)   | C9   | C10  | O1   | 124.2(4) |
| O2   | S003 | O3   | 114.14(18) | C9   | C10  | C11  | 119.8(4) |
| O2   | S003 | O4   | 115.2(2)   | C3   | C4   | N2   | 106.5(3) |
| C13  | S003 | O3   | 103.4(2)   | C4   | C3   | N1   | 109.9(3) |
| C13  | S003 | O4   | 103.43(19) | C8   | C7   | N3   | 110.5(3) |
| C13  | S003 | O2   | 102.6(2)   | C6   | C5   | N2   | 106.9(3) |
| C2   | N1   | Fe01 | 111.7(2)   | C10  | C9   | C8   | 117.9(4) |
| C3   | N1   | Fe01 | 107.4(2)   | F2   | C13  | S003 | 111.5(3) |
| C3   | N1   | C2   | 112.4(3)   | F1   | C13  | S003 | 112.2(3) |
| C4   | N2   | Fe01 | 110.7(2)   | F1   | C13  | F2   | 107.8(4) |
| C5   | N2   | Fe01 | 111.8(3)   | F3   | C13  | S003 | 110.1(3) |
| C5   | N2   | C4   | 115.8(3)   | F3   | C13  | F2   | 107.4(4) |
| C12  | O1   | C10  | 118.2(4)   | F3   | C13  | F1   | 107.6(4) |
| C6   | N3   | Fe01 | 108.8(2)   |      |      |      |          |

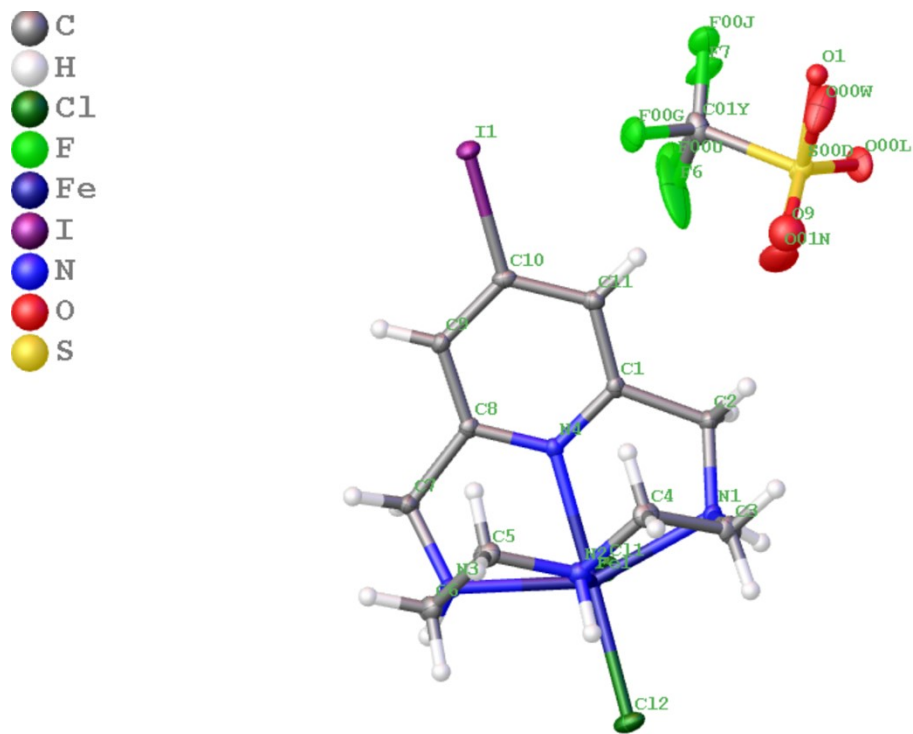

**Figure S13.** Solid state structure of **FeL4** showing atom labeling.

**Table S7.** Bond Lengths for **FeL4**.

| Atom | Atom | Length/Å  | Atom | Atom | Length/Å  |
|------|------|-----------|------|------|-----------|
| I1   | C10  | 2.092(3)  | F00U | C01Y | 1.324(11) |
| I002 | C20  | 2.093(3)  | F00U | F7   | 1.58(9)   |
| I003 | C31  | 2.091(3)  | N00V | C12  | 1.487(4)  |
| I003 | I3   | 0.53(4)   | N00V | C13  | 1.485(4)  |
| Fe04 | C14  | 2.2883(8) | O00W | O1   | 0.71(8)   |
| Fe04 | Cl3  | 2.2527(8) | F00X | C026 | 1.326(4)  |
| Fe04 | N00H | 2.122(2)  | N00Y | C32  | 1.476(4)  |
| Fe04 | N00S | 2.164(3)  | N00Y | C25  | 1.479(4)  |
| Fe04 | N00V | 2.186(3)  | N2   | C4   | 1.479(4)  |
| Fe04 | N01C | 2.188(3)  | N2   | C5   | 1.479(4)  |
| Fe1  | C11  | 2.2876(8) | N010 | C24  | 1.490(4)  |
| Fe1  | Cl2  | 2.2397(8) | N010 | C23  | 1.476(4)  |
| Fe1  | N4   | 2.124(2)  | N011 | C28  | 1.483(4)  |
| Fe1  | N1   | 2.163(2)  | N011 | C27  | 1.494(4)  |
| Fe1  | N3   | 2.178(2)  | C18  | C19  | 1.389(4)  |
| Fe1  | N2   | 2.215(3)  | C18  | C17  | 1.506(4)  |
| Fe06 | C15  | 2.2600(9) | C1   | C11  | 1.382(4)  |
| Fe06 | C1   | 2.2463(8) | C1   | C2   | 1.511(4)  |
| Fe06 | N00N | 2.110(2)  | C10  | C11  | 1.400(4)  |
| Fe06 | N00Y | 2.209(3)  | C10  | C9   | 1.399(4)  |

|           |           |           |           |
|-----------|-----------|-----------|-----------|
| Fe06 N010 | 2.198(3)  | C20 C19   | 1.391(4)  |
| Fe06 N011 | 2.170(3)  | C20 C21   | 1.391(4)  |
| S00C O00O | 1.446(2)  | C33 C26   | 1.389(4)  |
| S00C O00T | 1.442(3)  | C33 C23   | 1.508(4)  |
| S00C O018 | 1.436(3)  | C22 C21   | 1.383(4)  |
| S00C C026 | 1.815(3)  | C22 C12   | 1.505(4)  |
| S00D O00L | 1.434(2)  | N01C C15  | 1.471(5)  |
| S00D O00W | 1.431(3)  | N01C C14  | 1.482(5)  |
| S00D O01N | 1.442(3)  | C9 C8     | 1.385(4)  |
| S00D C01Y | 1.826(3)  | C8 C7     | 1.519(4)  |
| S00D O9   | 1.45(3)   | C30 C31   | 1.389(4)  |
| S00D O1   | 1.58(5)   | C30 C29   | 1.388(4)  |
| S00F O01F | 1.439(4)  | C31 C26   | 1.395(4)  |
| S00F O023 | 1.452(5)  | C31 I3    | 2.116(11) |
| S00F C029 | 1.812(6)  | C29 C28   | 1.504(4)  |
| S00F O10  | 1.437(5)  | O01N O9   | 0.77(5)   |
| F00G C01Y | 1.341(4)  | C3 C4     | 1.527(4)  |
| N00H C18  | 1.343(4)  | C32 C24   | 1.512(4)  |
| N00H C22  | 1.344(4)  | C6 C5     | 1.514(5)  |
| F00I C026 | 1.322(4)  | C25 C27   | 1.515(5)  |
| F00J C01Y | 1.360(10) | C01Y F6   | 1.36(4)   |
| F00J F7   | 0.64(8)   | C01Y F7   | 1.14(3)   |
| N4 C1     | 1.340(4)  | F021 C029 | 1.324(7)  |
| N4 C8     | 1.338(4)  | C13 C14   | 1.511(6)  |
| F00M C026 | 1.329(4)  | C16 C15   | 1.517(6)  |
| N00N C33  | 1.339(4)  | F027 C029 | 1.331(7)  |
| N00N C29  | 1.341(4)  | O10A S00G | 1.433(14) |
| N1 C2     | 1.487(4)  | O01G S00G | 1.464(14) |
| N1 C3     | 1.488(4)  | S00G O0   | 1.440(15) |
| N3 C7     | 1.491(4)  | S00G C0   | 1.796(14) |
| N3 C6     | 1.489(4)  | C0 F0     | 1.339(17) |
| F00R C029 | 1.325(9)  | C0 F1     | 1.311(14) |
| N00S C17  | 1.486(4)  | C0 F00S   | 1.337(13) |
| N00S C16  | 1.492(5)  |           |           |

**Table S8.** Bond Angles for **FeL4**.

| Atom | Atom | Atom | Angle/°    | Atom | Atom | Atom | Angle/°    |
|------|------|------|------------|------|------|------|------------|
| I3   | I003 | C31  | 85.4(10)   | C28  | N011 | Fe06 | 110.28(18) |
| Cl3  | Fe04 | Cl4  | 98.19(3)   | C28  | N011 | C27  | 113.3(3)   |
| N00H | Fe04 | Cl4  | 90.46(7)   | C27  | N011 | Fe06 | 109.63(19) |
| N00H | Fe04 | Cl3  | 171.20(7)  | N00H | C18  | C19  | 121.3(3)   |
| N00H | Fe04 | N00S | 76.16(9)   | N00H | C18  | C17  | 114.4(2)   |
| N00H | Fe04 | N00V | 76.44(9)   | C19  | C18  | C17  | 124.2(3)   |
| N00H | Fe04 | N01C | 83.83(10)  | N4   | C1   | C11  | 120.9(3)   |
| N00S | Fe04 | Cl4  | 98.70(8)   | N4   | C1   | C2   | 114.2(2)   |
| N00S | Fe04 | Cl3  | 100.82(7)  | C11  | C1   | C2   | 124.9(3)   |
| N00S | Fe04 | N00V | 146.94(10) | C11  | C10  | I1   | 119.2(2)   |
| N00S | Fe04 | N01C | 79.72(12)  | C9   | C10  | I1   | 120.6(2)   |
| N00V | Fe04 | Cl4  | 99.66(8)   | C9   | C10  | C11  | 120.2(3)   |
| N00V | Fe04 | Cl3  | 103.47(7)  | C19  | C20  | I002 | 119.7(2)   |
| N00V | Fe04 | N01C | 79.29(12)  | C19  | C20  | C21  | 121.3(3)   |
| N01C | Fe04 | Cl4  | 174.28(8)  | C21  | C20  | I002 | 119.0(2)   |
| N01C | Fe04 | Cl3  | 87.51(7)   | N00N | C33  | C26  | 121.2(3)   |
| Cl2  | Fe1  | C11  | 100.40(3)  | N00N | C33  | C23  | 114.4(3)   |
| N4   | Fe1  | C11  | 88.94(7)   | C26  | C33  | C23  | 124.4(3)   |
| N4   | Fe1  | Cl2  | 170.67(7)  | C1   | C11  | C10  | 118.3(3)   |
| N4   | Fe1  | N1   | 76.75(9)   | C18  | C19  | C20  | 117.4(3)   |
| N4   | Fe1  | N3   | 76.41(9)   | N00H | C22  | C21  | 121.1(3)   |
| N4   | Fe1  | N2   | 82.89(9)   | N00H | C22  | C12  | 114.6(2)   |
| N1   | Fe1  | C11  | 97.41(7)   | C21  | C22  | C12  | 124.2(3)   |
| N1   | Fe1  | Cl2  | 101.89(7)  | C15  | N01C | Fe04 | 110.2(2)   |
| N1   | Fe1  | N3   | 146.94(9)  | C15  | N01C | C14  | 116.4(3)   |
| N1   | Fe1  | N2   | 79.01(9)   | C14  | N01C | Fe04 | 110.8(2)   |
| N3   | Fe1  | C11  | 101.02(7)  | C8   | C9   | C10  | 117.6(3)   |
| N3   | Fe1  | Cl2  | 101.46(7)  | N4   | C8   | C9   | 121.5(3)   |
| N3   | Fe1  | N2   | 78.85(9)   | N4   | C8   | C7   | 113.9(2)   |
| N2   | Fe1  | C11  | 171.64(7)  | C9   | C8   | C7   | 124.6(3)   |
| N2   | Fe1  | Cl2  | 87.78(7)   | C22  | C21  | C20  | 117.8(3)   |
| Cl   | Fe06 | Cl5  | 100.21(3)  | C29  | C30  | C31  | 118.1(3)   |
| N00N | Fe06 | Cl5  | 88.81(7)   | N1   | C2   | C1   | 110.6(2)   |
| N00N | Fe06 | Cl   | 170.52(7)  | N00S | C17  | C18  | 110.7(2)   |
| N00N | Fe06 | N00Y | 83.64(9)   | I003 | C31  | I3   | 14.5(10)   |
| N00N | Fe06 | N010 | 76.09(9)   | C30  | C31  | I003 | 120.5(2)   |
| N00N | Fe06 | N011 | 76.94(9)   | C30  | C31  | C26  | 120.9(3)   |
| N00Y | Fe06 | Cl5  | 171.87(7)  | C30  | C31  | I3   | 109.6(9)   |
| N00Y | Fe06 | Cl   | 87.49(7)   | C26  | C31  | I003 | 118.5(2)   |
| N010 | Fe06 | Cl5  | 102.22(7)  | C26  | C31  | I3   | 128.8(8)   |
| N010 | Fe06 | Cl   | 98.93(7)   | C33  | C26  | C31  | 117.5(3)   |
| N010 | Fe06 | N00Y | 78.93(9)   | N00N | C29  | C30  | 120.7(3)   |

| Atom | Atom | Atom | Angle/°    | Atom | Atom | Atom | Angle/°   |
|------|------|------|------------|------|------|------|-----------|
| N011 | Fe06 | C15  | 96.80(7)   | N00N | C29  | C28  | 115.0(2)  |
| N011 | Fe06 | C1   | 104.61(7)  | C30  | C29  | C28  | 124.3(3)  |
| N011 | Fe06 | N00Y | 78.59(10)  | O9   | O01N | S00D | 75(2)     |
| N011 | Fe06 | N010 | 146.45(10) | N3   | C7   | C8   | 110.1(2)  |
| O00O | S00C | C026 | 104.43(16) | N00V | C12  | C22  | 111.7(3)  |
| O00T | S00C | O00O | 113.83(15) | N1   | C3   | C4   | 109.8(2)  |
| O00T | S00C | C026 | 103.44(17) | N2   | C4   | C3   | 106.7(2)  |
| O018 | S00C | O00O | 114.64(18) | N011 | C28  | C29  | 111.4(2)  |
| O018 | S00C | O00T | 115.12(18) | N00Y | C32  | C24  | 107.3(2)  |
| O018 | S00C | C026 | 103.41(16) | N010 | C24  | C32  | 110.2(2)  |
| O00L | S00D | O01N | 114.2(3)   | N3   | C6   | C5   | 110.3(2)  |
| O00L | S00D | C01Y | 103.33(15) | N010 | C23  | C33  | 111.5(2)  |
| O00L | S00D | O9   | 134.3(17)  | N00Y | C25  | C27  | 107.4(3)  |
| O00L | S00D | O1   | 99(2)      | F00G | C01Y | S00D | 111.8(2)  |
| O00W | S00D | O00L | 115.0(2)   | F00G | C01Y | F00J | 105.0(6)  |
| O00W | S00D | O01N | 116.3(5)   | F00G | C01Y | F6   | 101(3)    |
| O00W | S00D | C01Y | 103.2(2)   | F00J | C01Y | S00D | 110.7(3)  |
| O00W | S00D | O9   | 85(2)      | F00U | C01Y | S00D | 114.6(5)  |
| O00W | S00D | O1   | 27(3)      | F00U | C01Y | F00G | 108.7(6)  |
| O01N | S00D | C01Y | 102.2(2)   | F00U | C01Y | F00J | 105.4(8)  |
| O01N | S00D | O9   | 31.0(19)   | F00U | C01Y | F6   | 19(6)     |
| O01N | S00D | O1   | 142(3)     | F6   | C01Y | S00D | 103(4)    |
| O9   | S00D | C01Y | 111.4(13)  | F6   | C01Y | F00J | 124(6)    |
| O9   | S00D | O1   | 111(4)     | F7   | C01Y | S00D | 115.0(16) |
| O1   | S00D | C01Y | 88(3)      | F7   | C01Y | F00G | 123(3)    |
| O01F | S00F | O023 | 113.9(3)   | F7   | C01Y | F00J | 28(4)     |
| O01F | S00F | C029 | 103.0(3)   | F7   | C01Y | F00U | 79(5)     |
| O023 | S00F | C029 | 103.2(3)   | F7   | C01Y | F6   | 98(8)     |
| O10  | S00F | O01F | 116.0(3)   | N2   | C5   | C6   | 106.5(2)  |
| O10  | S00F | O023 | 113.6(3)   | N011 | C27  | C25  | 109.9(2)  |
| O10  | S00F | C029 | 105.1(4)   | N00V | C13  | C14  | 110.0(3)  |
| C18  | N00H | Fe04 | 119.38(19) | N00S | C16  | C15  | 109.7(3)  |
| C22  | N00H | Fe04 | 119.52(19) | N01C | C15  | C16  | 106.9(3)  |
| C22  | N00H | C18  | 121.1(2)   | F00I | C026 | S00C | 111.6(2)  |
| F7   | F00J | C01Y | 57(2)      | F00I | C026 | F00M | 107.6(3)  |
| C1   | N4   | Fe1  | 118.91(18) | F00I | C026 | F00X | 107.7(3)  |
| C8   | N4   | Fe1  | 119.36(19) | F00M | C026 | S00C | 110.3(3)  |
| C8   | N4   | C1   | 121.4(2)   | F00X | C026 | S00C | 110.6(2)  |
| C33  | N00N | Fe06 | 120.01(19) | F00X | C026 | F00M | 108.9(3)  |
| C33  | N00N | C29  | 121.5(2)   | N01C | C14  | C13  | 107.6(3)  |
| C29  | N00N | Fe06 | 118.49(19) | F00R | C029 | S00F | 111.3(5)  |
| C2   | N1   | Fe1  | 111.27(17) | F00R | C029 | F027 | 107.4(6)  |
| C2   | N1   | C3   | 112.7(2)   | F021 | C029 | S00F | 110.1(4)  |
| C3   | N1   | Fe1  | 108.56(17) | F021 | C029 | F00R | 109.5(7)  |



| Atom | Atom | Atom | Angle/°    | Atom | Atom | Atom | Angle/°   |
|------|------|------|------------|------|------|------|-----------|
| C7   | N3   | Fe1  | 110.71(17) | F021 | C029 | F027 | 109.3(5)  |
| C6   | N3   | Fe1  | 108.41(18) | F027 | C029 | S00F | 109.3(4)  |
| C6   | N3   | C7   | 112.4(2)   | I003 | I3   | C31  | 80.1(14)  |
| C17  | N00S | Fe04 | 111.79(18) | F00J | F7   | F00U | 146(3)    |
| C17  | N00S | C16  | 113.2(3)   | F00J | F7   | C01Y | 96(5)     |
| C16  | N00S | Fe04 | 107.7(2)   | C01Y | F7   | F00U | 56(3)     |
| C01Y | F00U | F7   | 45.2(18)   | O01N | O9   | S00D | 74(3)     |
| C12  | N00V | Fe04 | 111.20(18) | O00W | O1   | S00D | 65(4)     |
| C13  | N00V | Fe04 | 107.8(2)   | O10A | S00G | O01G | 115.2(13) |
| C13  | N00V | C12  | 113.0(3)   | O10A | S00G | O0   | 113.9(13) |
| O1   | O00W | S00D | 89(4)      | O10A | S00G | C0   | 102.8(11) |
| C32  | N00Y | Fe06 | 110.57(18) | O01G | S00G | C0   | 104.5(10) |
| C32  | N00Y | C25  | 115.7(2)   | O0   | S00G | O01G | 114.1(13) |
| C25  | N00Y | Fe06 | 111.32(19) | O0   | S00G | C0   | 104.5(10) |
| C4   | N2   | Fe1  | 110.88(18) | F0   | C0   | S00G | 112.1(15) |
| C4   | N2   | C5   | 116.6(2)   | F1   | C0   | S00G | 110.0(10) |
| C5   | N2   | Fe1  | 110.43(19) | F1   | C0   | F0   | 108.6(15) |
| C24  | N010 | Fe06 | 107.74(18) | F1   | C0   | F00S | 108.3(11) |
| C23  | N010 | Fe06 | 110.88(18) | F00S | C0   | S00G | 109.5(10) |
| C23  | N010 | C24  | 113.0(2)   | F00S | C0   | F0   | 108.2(14) |

1. Fulmer, G. R.; Miller, A. J. M.; Sherden, N. H.; Gottlieb, H. E.; Nudelman, A.; Stoltz, B. M.; Bercaw, J. E.; Goldberg, K. I., *Organometallics* **2010**, *29*, 2176-2179.
2. (a) Lincoln, K. M.; Gonzalez, P.; Richardson, T. E.; Julovich, D. A.; Saunders, R.; Simpkins, J. W.; Green, K. N., *Chemical Communication* **2013**, *49*, 2712-2714; (b) Yepremyan, A.; Mekhail, M. A.; Niebuhr, B. P.; Pota, K.; Sadagopan, N.; Schwartz, T. M.; Green, K. N., *The Journal of Organic Chemistry* **2020**, *85*, 4988-4998.
3. (a) Manov, G. G.; Delollis, N. J.; Lindvall, P. W.; Acree, S. F., *J. Res. Natl. Bur. Stand.* **1946**, *36*, 543-558; (b) Manov, G. G.; Delollis, N. J.; Acree, S. F., *J. Res. Natl. Bur. Stand.* **1945**, *34*, 115-127.
4. Irving, H.; Miles, M.; Pettit, L., *Anal Chim Acta* **1967**, *38*, 475-488.
5. Bush, A. I., *Front. Neurodegener.* **2011**, *2*, 97.
6. Mekhail, M. A.; Pota, K.; Schwartz, T. M.; Green, K. N., *RSC Advances* **2020**, *10*, 31165-31170.
7. *Bruker Advanced X-ray Solutions. APEX2* Version 2014.9-0; Bruker AXS Inc.: Madison, WI, 2007.
8. *Bruker Advanced X-ray Solutions. XSELL*, Version 6.3.1; Bruker AXS Inc.: Madison, WI 2004.
